# Supplementary material
Source: publisher figshare collection journal article supplement (https://gsapubs.figshare.com/articles/dataset/_/12541961)
Supplement: Supplementary file 1 [file 1]

Hammond, A.P., et al., 2019, The Aspen paleoriver: Linking Eocene magmatism to the world's largest Na-carbonate evaporate (Wyoming, USA): *Geology*, <https://doi.org/10.1130/G46419.1>

**Figure DR1A-P:** Study sites and measured stratigraphic sections in the Wasatch Formation, southern Wyoming.

**Measured stratigraphic sections:**

| Locality                | Sample ID | Member           | Latitude, Longitude    |
|-------------------------|-----------|------------------|------------------------|
| A. Cherokee Creek       | CC        | Cathedral Bluffs | 41.01033°, -108.02724° |
| B. Hangout Ridge: #1    | HOR       | Cathedral Bluffs | 41.09575°, -107.86373° |
| C. Hangout Ridge: #2    | HOR       | Cathedral Bluffs | 41.09583°, -107.86384° |
| D. Hangout Ridge: #3    | HOR       | Cathedral Bluffs | 41.09676°, -107.86500° |
| E. Hawk Ridge           | (none)    | Cathedral Bluffs | 41.08458°, -107.86916° |
| F. McPherson Springs    | MCP       | Cathedral Bluffs | 41.08605°, -107.94543° |
| G. Sand Creek Delta: #1 | SDC       | Cathedral Bluffs | 41.09517°, -107.92923° |
| H. Sand Creek Delta: #2 | SDC       | Cathedral Bluffs | 41.09565°, -107.92905° |
| I. Sand Creek Delta: #3 | SDC       | Cathedral Bluffs | 41.09755°, -107.92999° |
| J. Sand Creek Delta: #4 | SDC       | Cathedral Bluffs | 41.09311°, -107.92918° |
| K. Sand Creek Delta: #5 | SDC       | Cathedral Bluffs | 41.09739°, -107.92973° |

**Other study sites:**

|                      |        |                  |                        |
|----------------------|--------|------------------|------------------------|
| L. Hangout Wash      | (none) | Cathedral Bluffs | 41.10846°, -107.88181° |
| M. Red Creek         | (none) | Cathedral Bluffs | 41.04498°, -107.86577° |
| N. Cowfeed Sandstone | (none) | Cathedral Bluffs | 41.07309°, -107.95064° |
| O. Cannonball Ridge  | (none) | Cathedral Bluffs | 41.01608°, -108.03209° |
| P. County Road 148   | CR-148 | Main Body        | 41.00566°, -107.92300° |

# Cherokee Creek

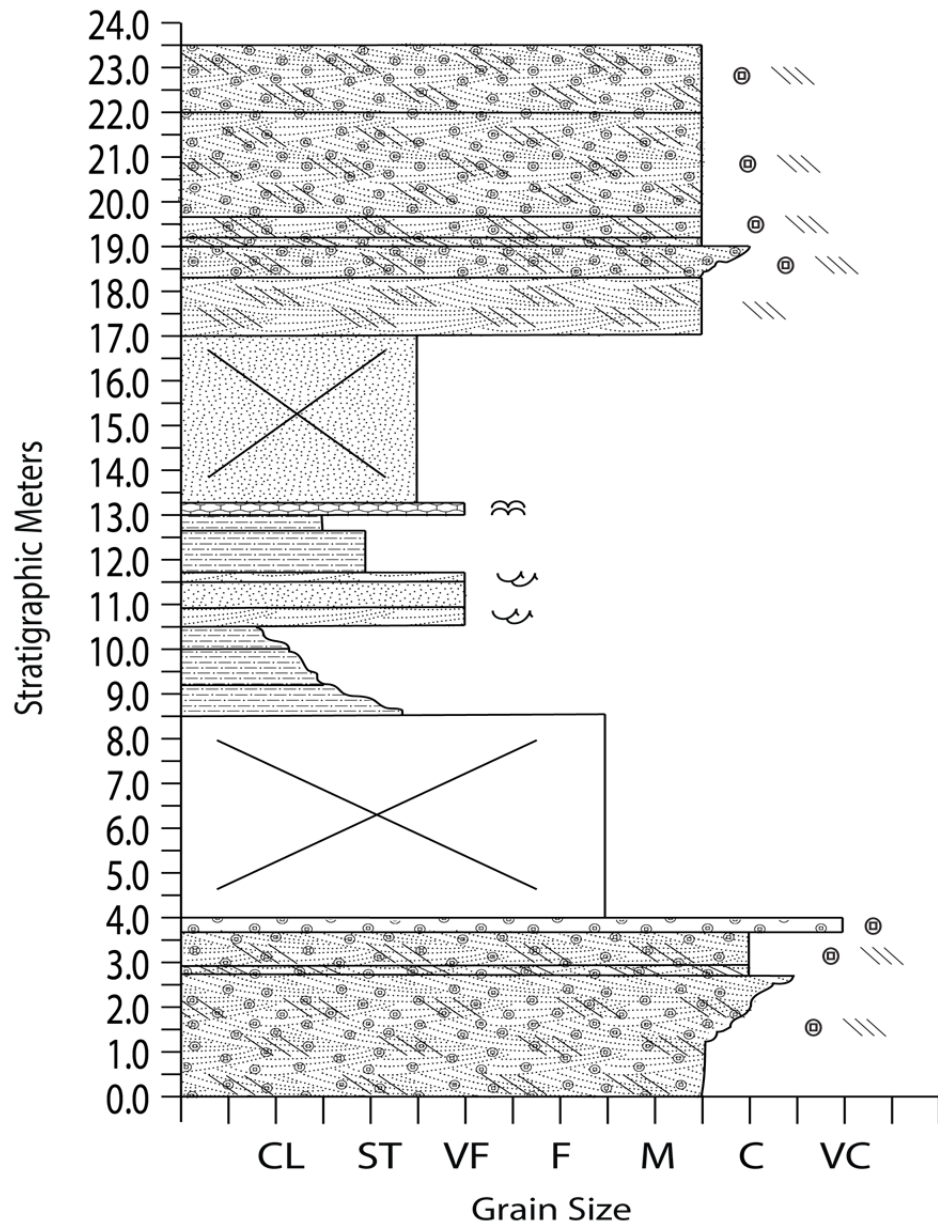

# Hangout Ridge: #1

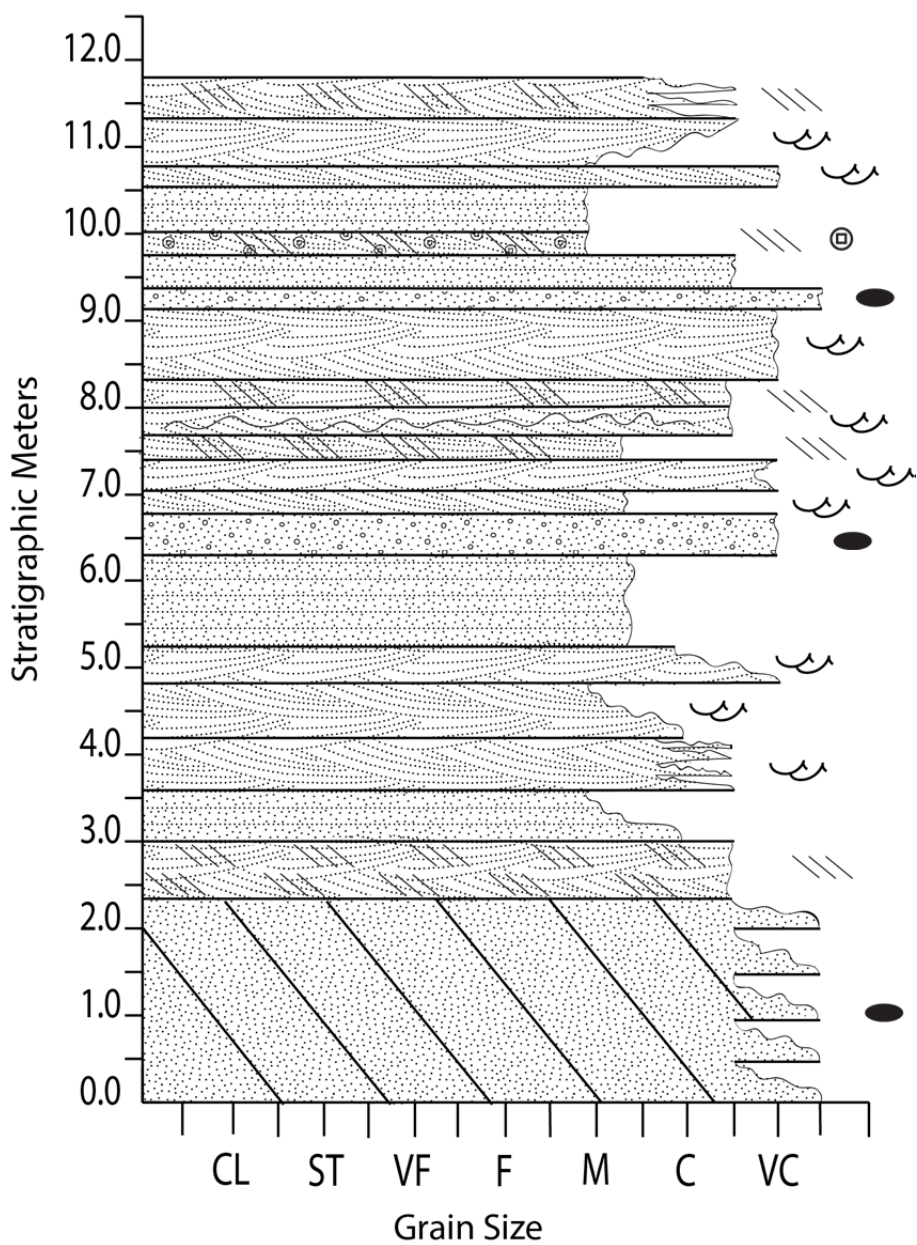

## Hangout Ridge: #2

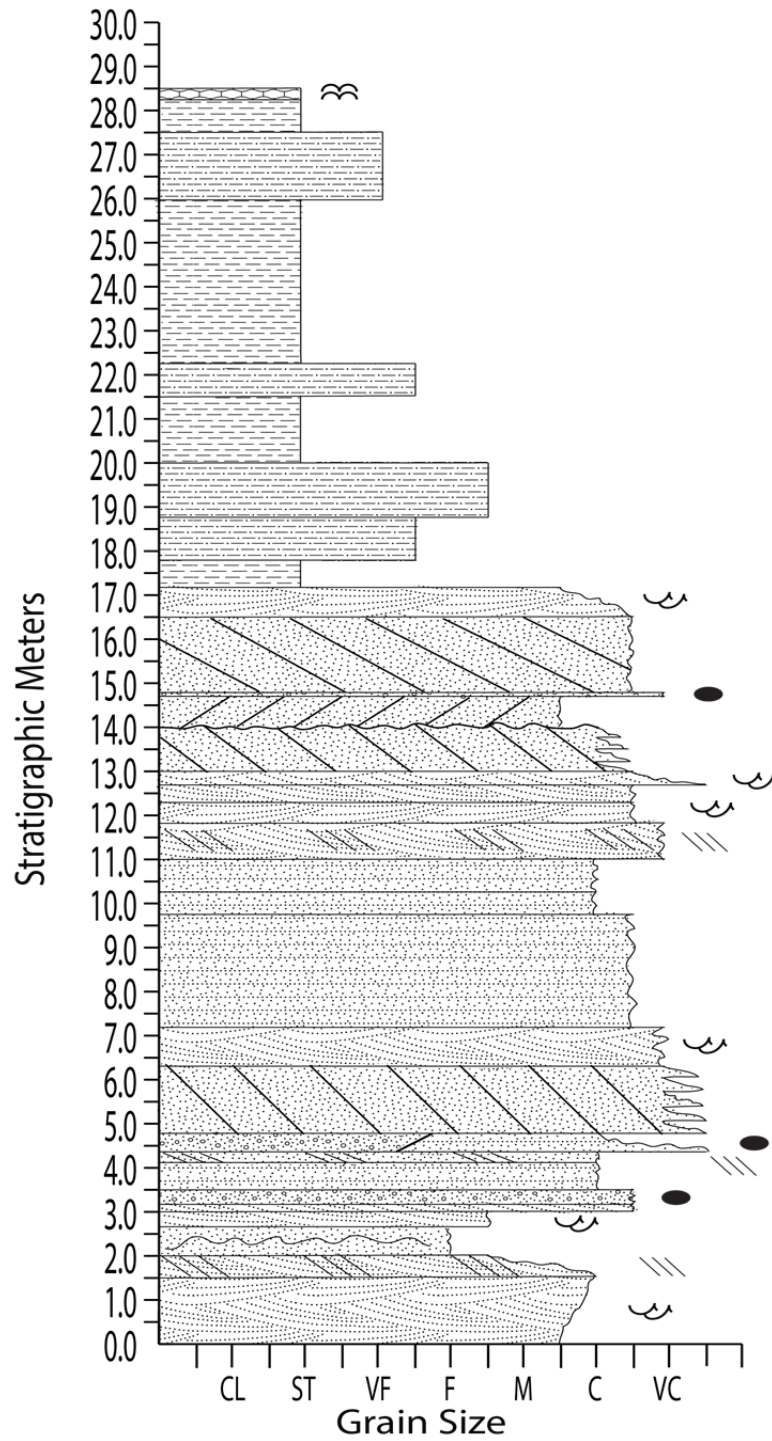

# Hangout Ridge: #3

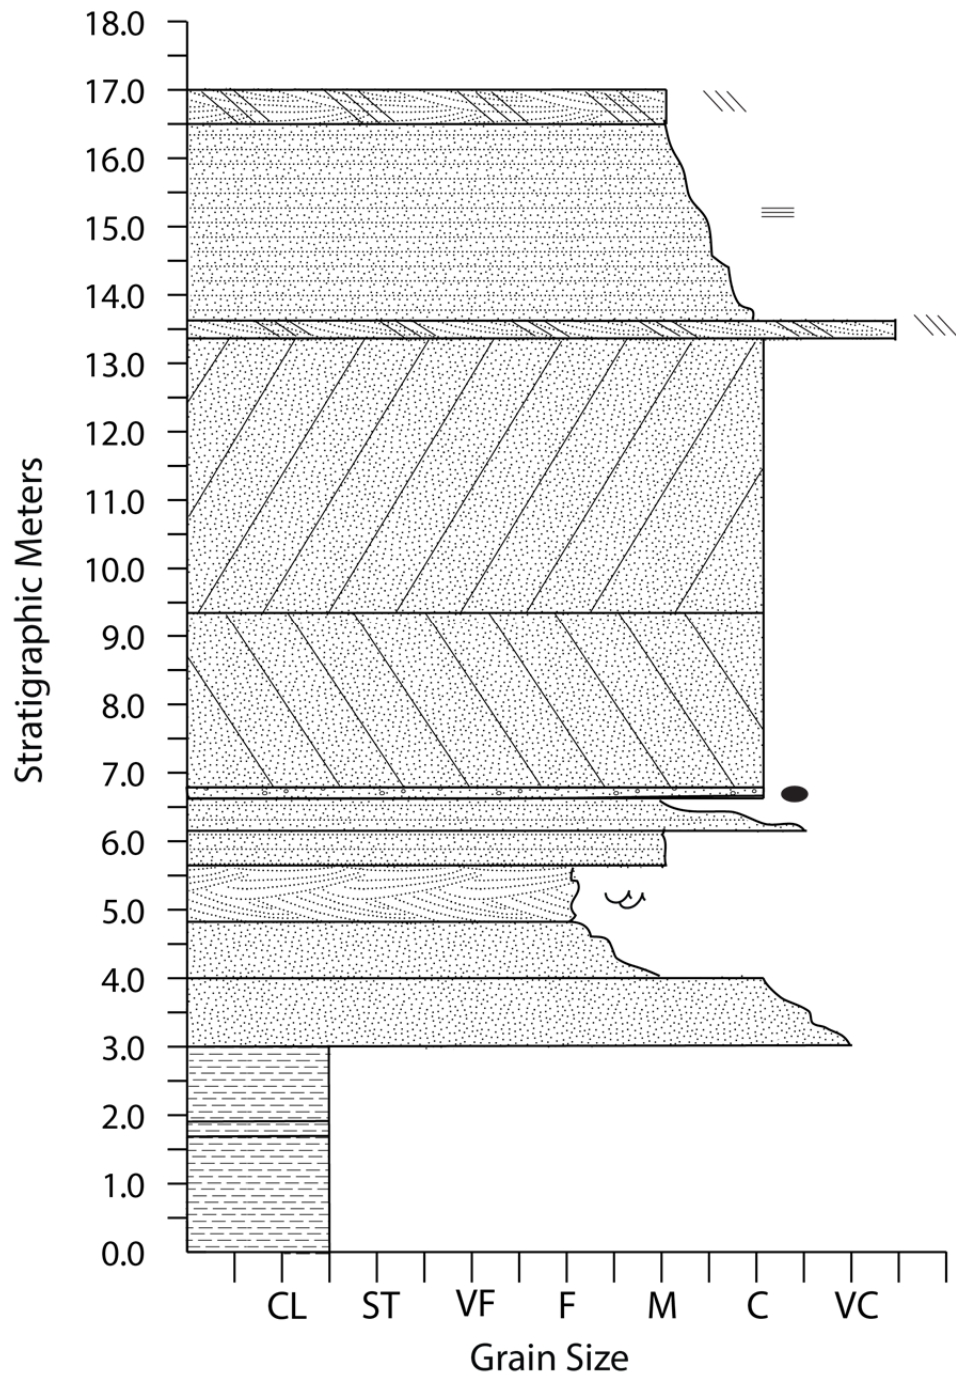



# Hawk Ridge

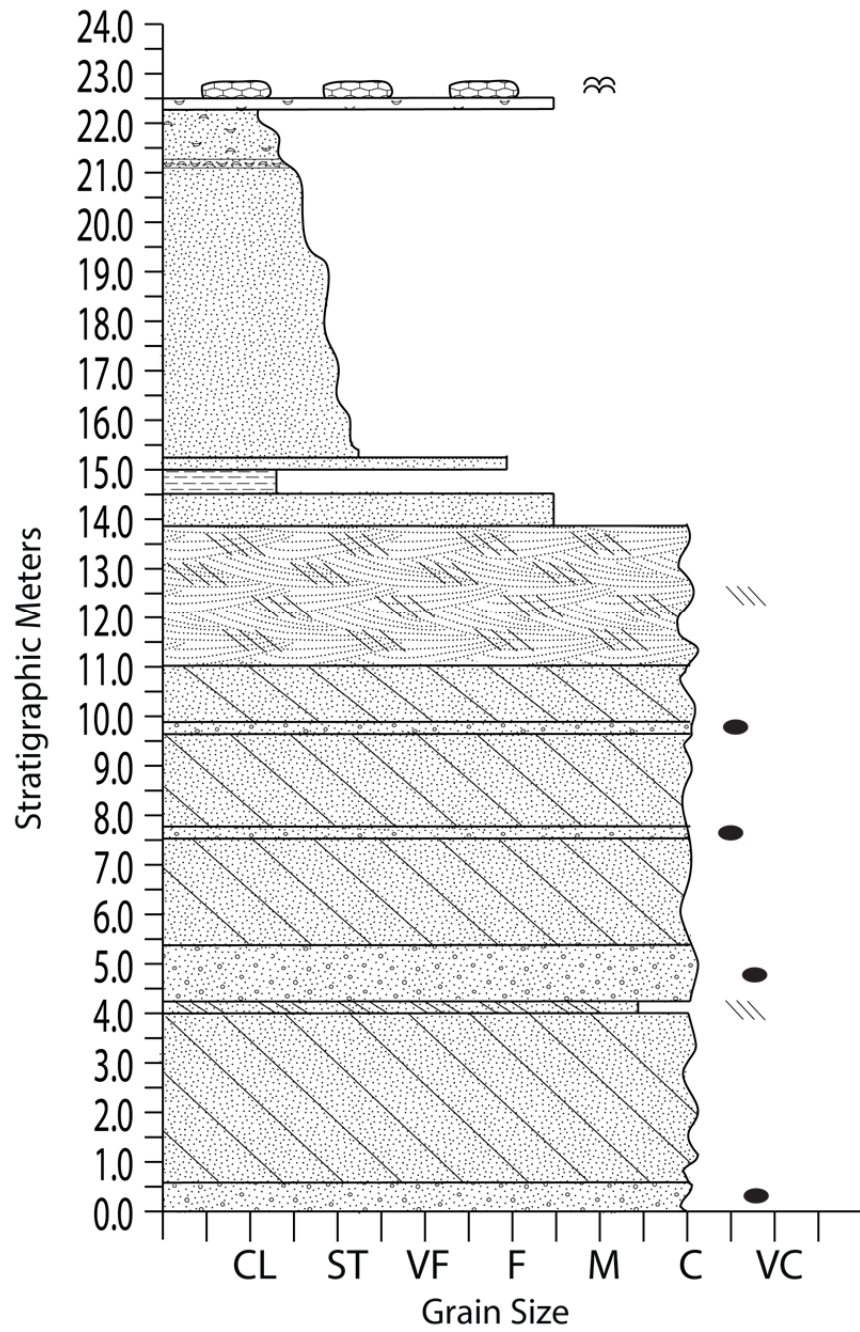

# McPherson Springs

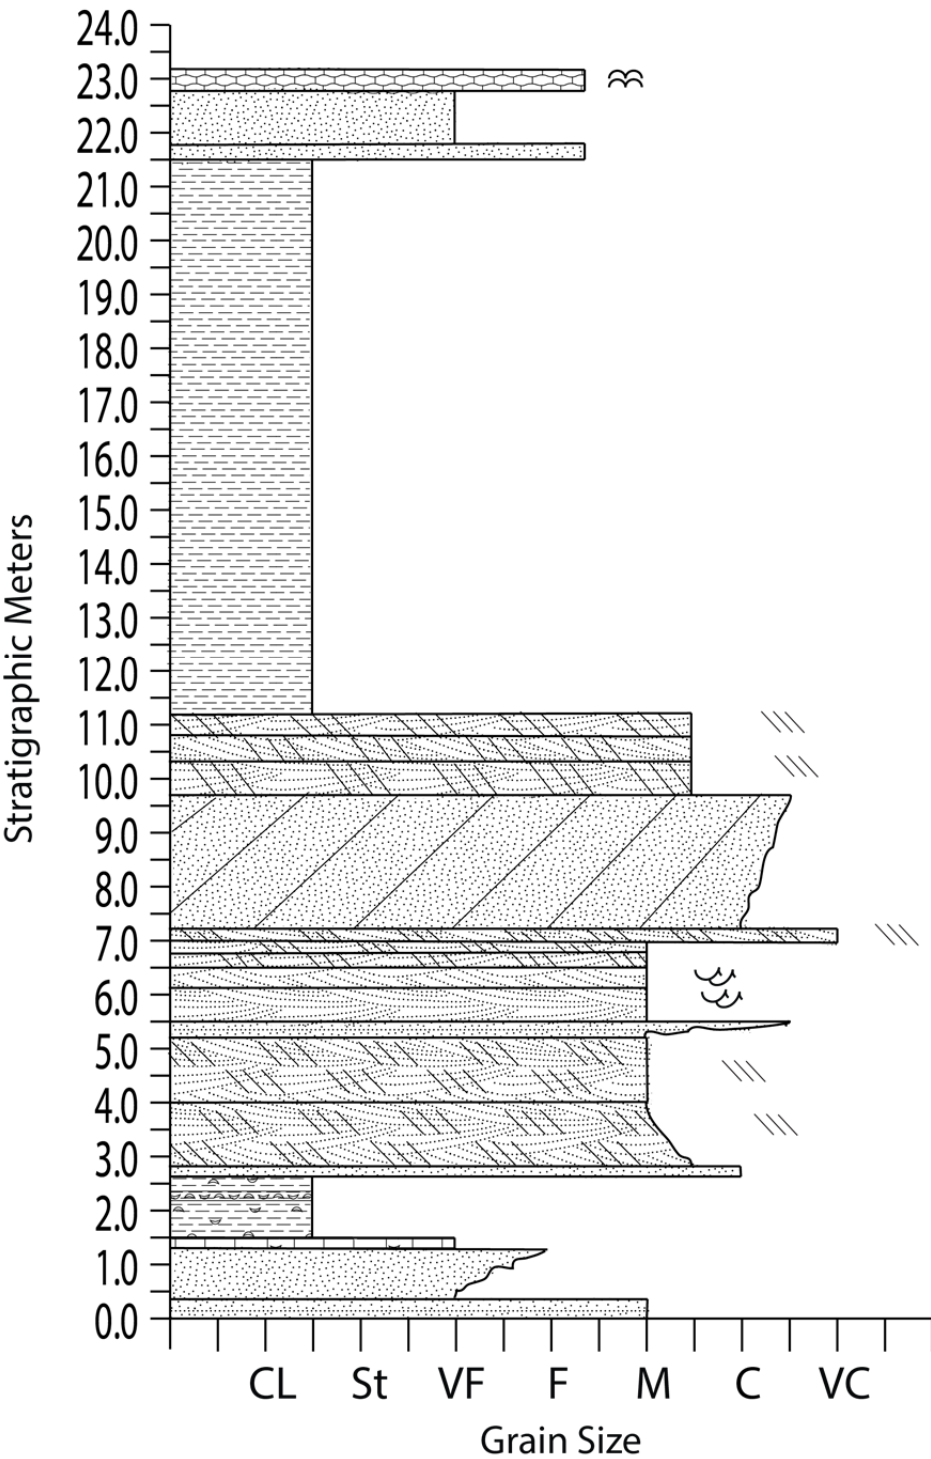

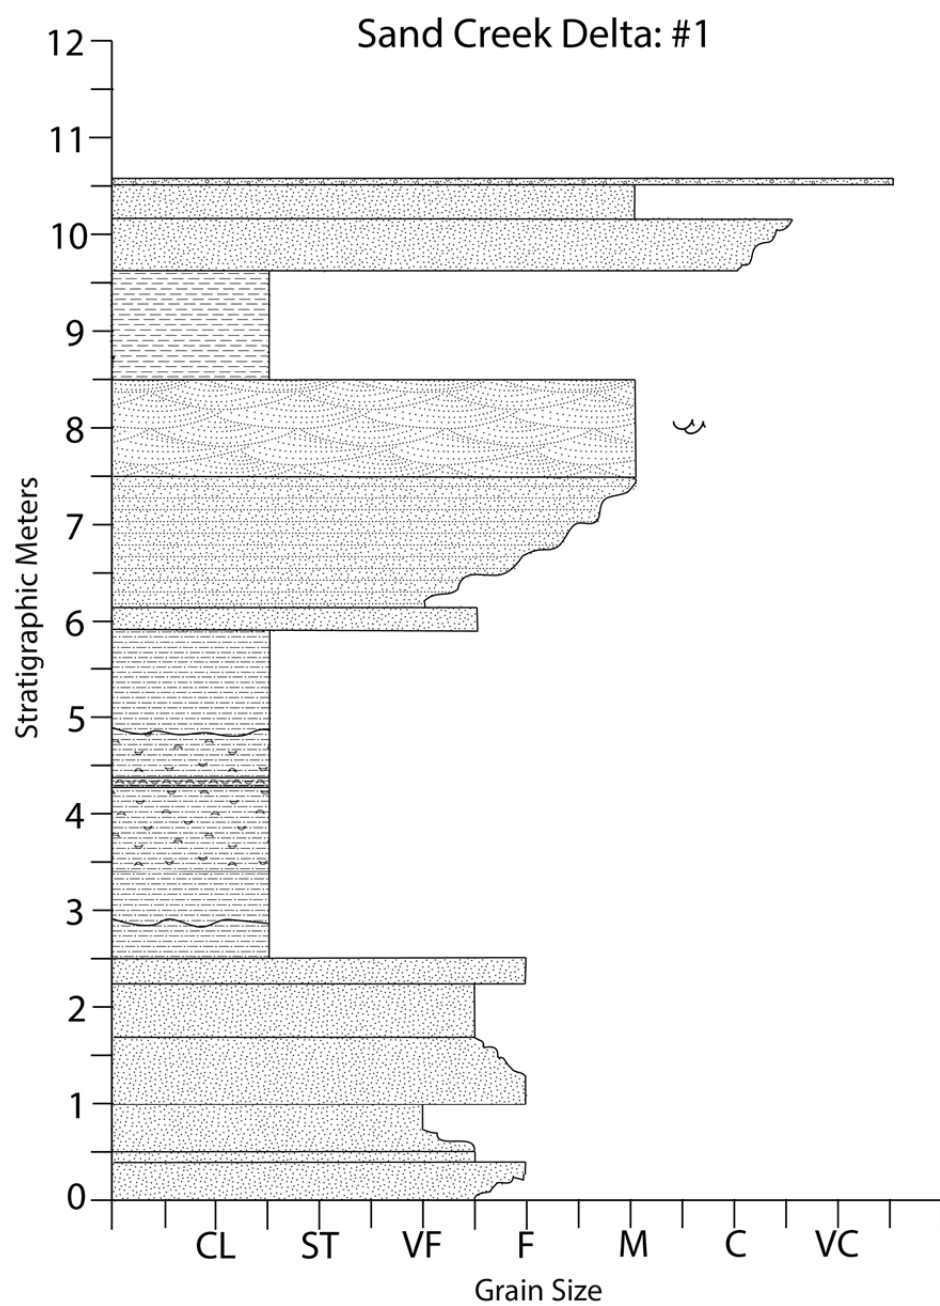



# Sand Creek Delta: #2

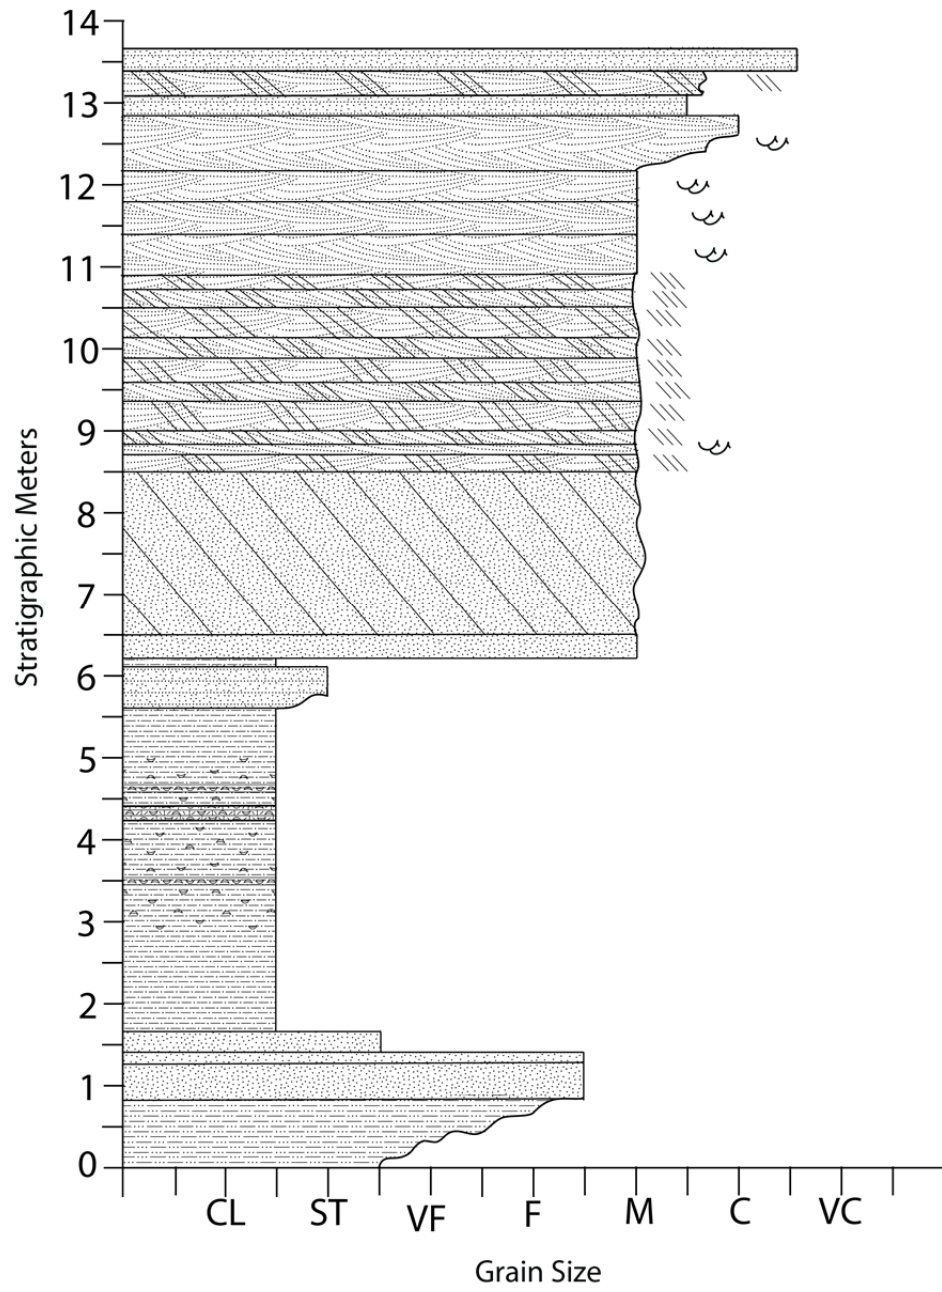

# Sand Creek Delta: #3

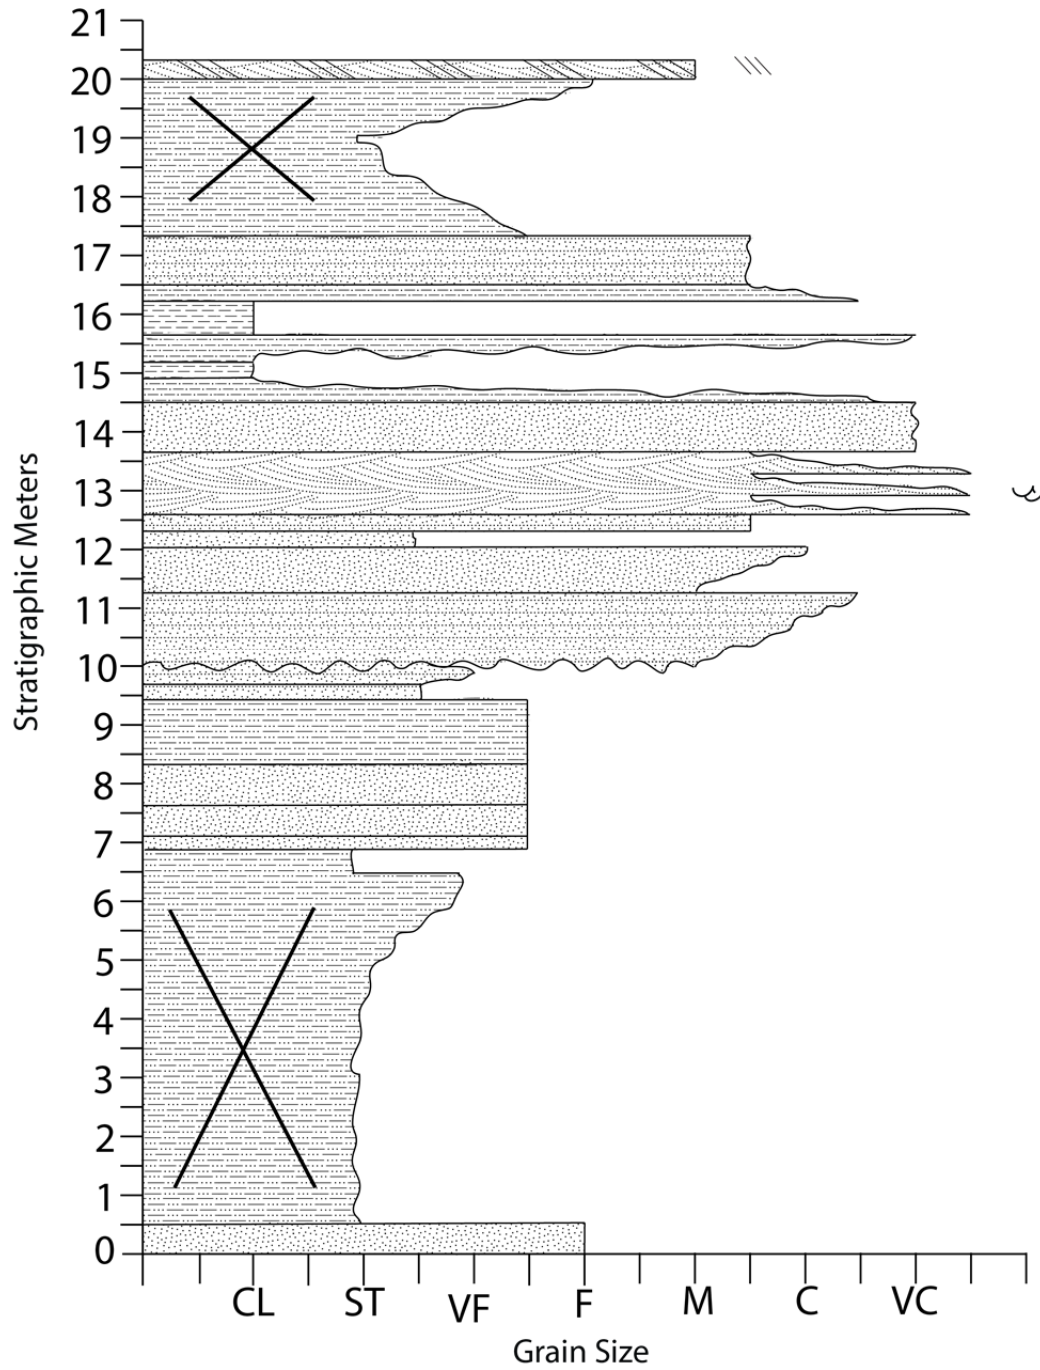

# Sand Creek Delta: #4.1-4.2 (up and down stream)

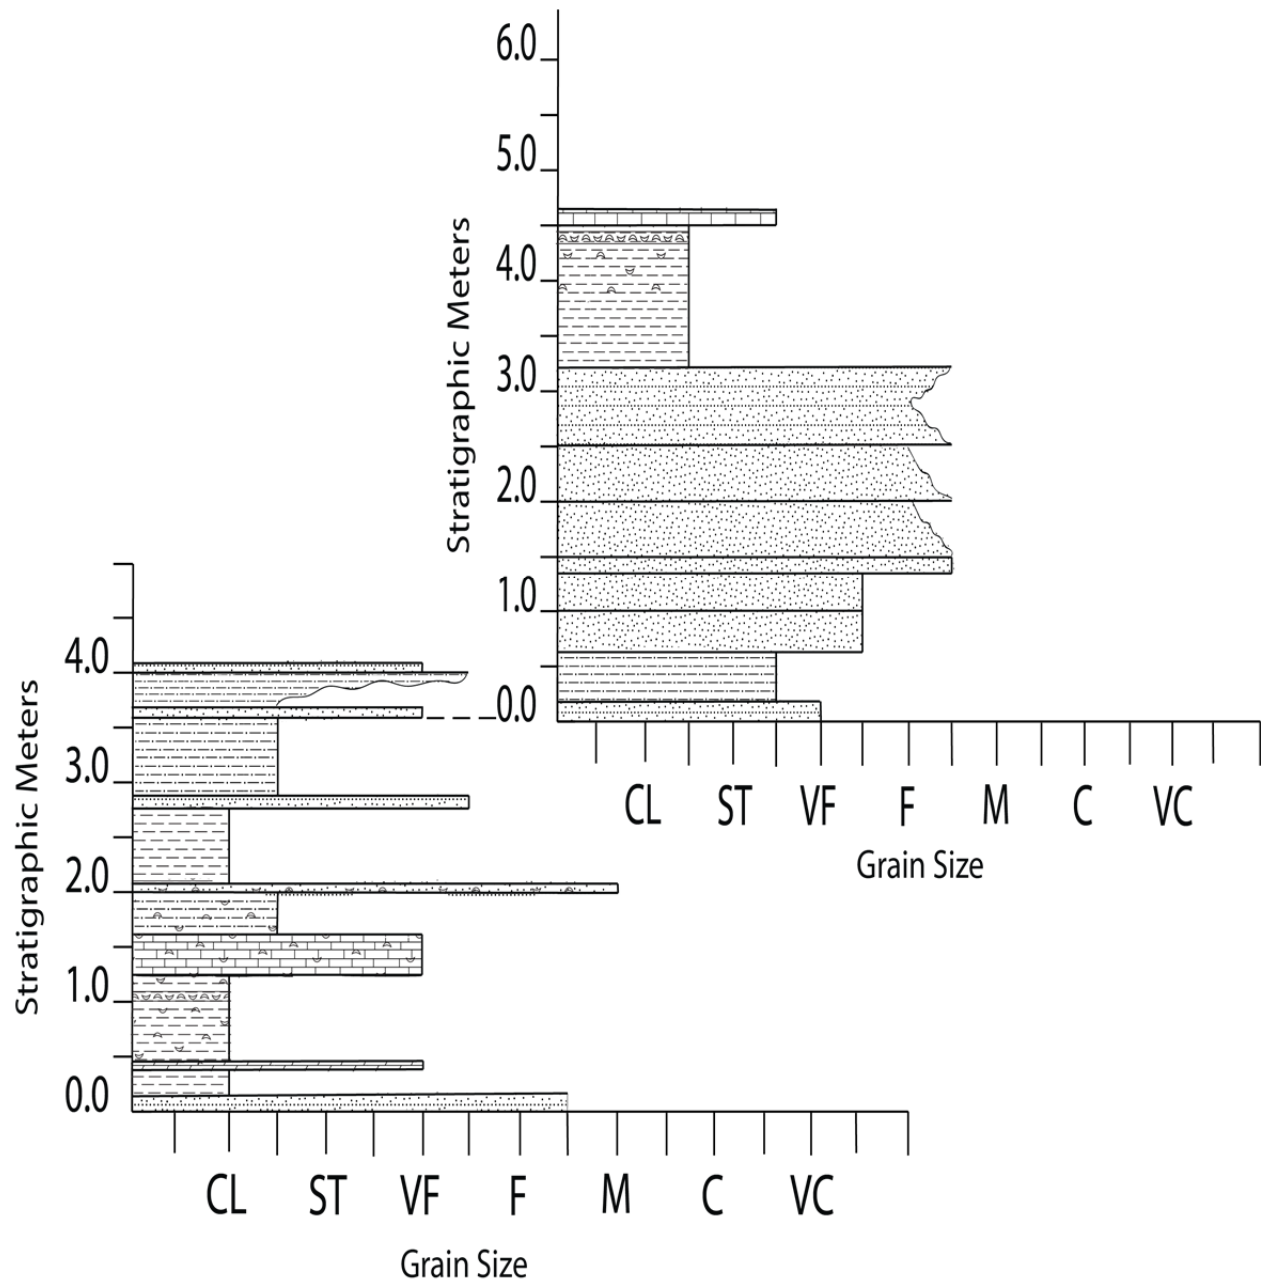

# Sand Creek Delta: #5

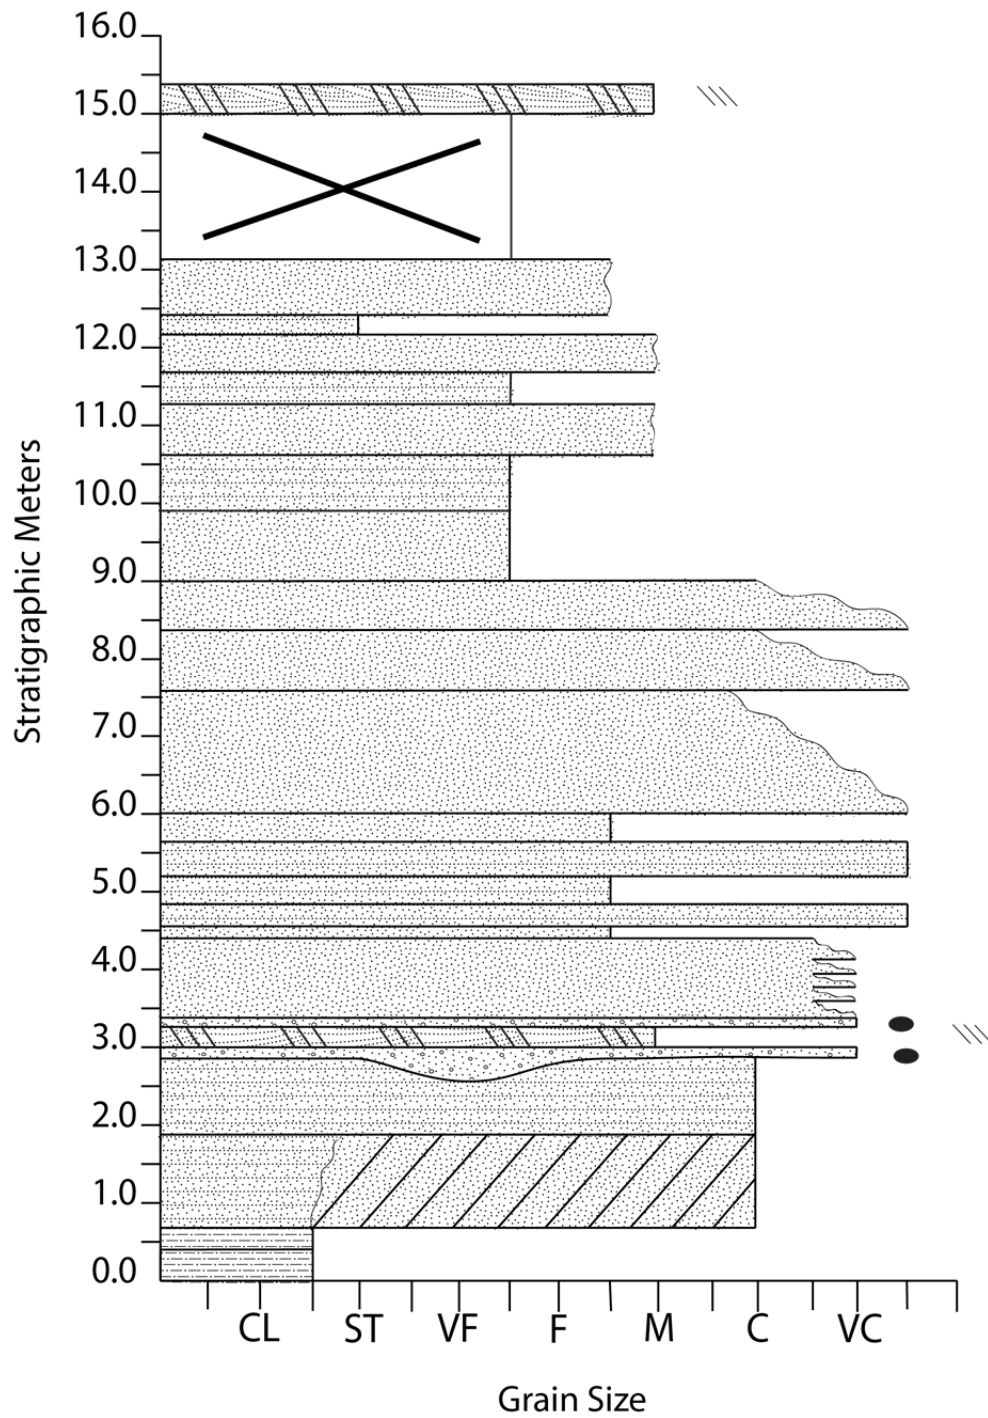

## STRATIGRAPHIC LEGEND

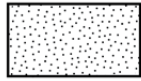

Massive sandstone or sand

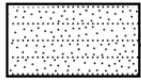

Bedded sandstone

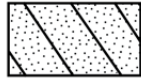

Lateral Accretions or Foresets

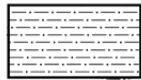

Silty sandy clay

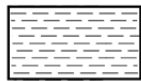

Clay or mudstone

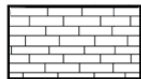

Limestone

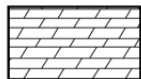

Dolostone

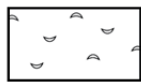

Ostracod fossils

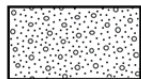

Coarse channelfill

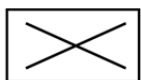

Scree/Alluvium

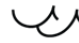

Trough Cross-beds

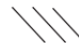

Planar Cross-beds

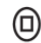

Concretions

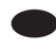

Claystone Intraclasts

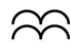

Stromatolites

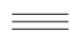

Planar Laminations



**Table DR1:** Sandstone point-count data from the Wasatch Formation, southern Wyoming.

|                               | <b>County<br/>Road 148<br/>(CR-148)</b> | <b>McPherson<br/>Springs<br/>(MCP)</b> | <b>Hangout<br/>Ridge<br/>(HOR)</b> | <b>Sand Creek<br/>Delta<br/>(CDC)</b> | <b>Cherokee<br/>Creek<br/>(CC)</b> |
|-------------------------------|-----------------------------------------|----------------------------------------|------------------------------------|---------------------------------------|------------------------------------|
| Q <sub>monocrystalline</sub>  | 172                                     | 171                                    | 206                                | 205                                   | 200                                |
| Q <sub>polycrystalline</sub>  | 9                                       | 23                                     | 19                                 | 5                                     | 6                                  |
| Q <sub>tot</sub>              | 181                                     | 194                                    | 225                                | 210                                   | 206                                |
|                               |                                         |                                        |                                    |                                       |                                    |
| Plag                          | 15                                      | 17                                     | 13                                 | 28                                    | 4                                  |
| K-feldspar                    | 97                                      | 89                                     | 126                                | 116                                   | 130                                |
| Feldspar <sub>tot</sub>       | 112                                     | 106                                    | 139                                | 144                                   | 134                                |
|                               |                                         |                                        |                                    |                                       |                                    |
| Lithic <sub>volcanic</sub>    | 6                                       | 12                                     | 14                                 | 6                                     | 14                                 |
| Lithic <sub>sedimentary</sub> | 50                                      | 17                                     | 24                                 | 21                                    | 50                                 |
| Lithic <sub>metamorphic</sub> | 4                                       | 6                                      | 13                                 | 6                                     | 6                                  |
| Lithic <sub>tot</sub>         | 60                                      | 35                                     | 51                                 | 33                                    | 70                                 |
|                               |                                         |                                        |                                    |                                       |                                    |
| Chlorite                      | 8                                       | 3                                      | 9                                  | 13                                    | 6                                  |
| Unidentified                  | 10                                      | 7                                      | 5                                  | 6                                     | 2                                  |
| Mica                          | 49                                      | 1                                      | 1                                  | 23                                    | 16                                 |
| Accessory                     | 0                                       | 1                                      | 1                                  | 2                                     | 2                                  |
|                               |                                         |                                        |                                    |                                       |                                    |
| Total Count                   | 420                                     | 347                                    | 431                                | 431                                   | 436                                |

Sandstone thin sections stained for potassium feldspar and plagioclase; see Ingersoll et al. (1984) for detailed description of point-counting methods.

Ingersoll, R.V., Bullard, T.F., Ford, R.L., Grimm, J.P., Pickle, J.D., and Sares, S.W., 1984, The effect of grain size on detrital modes: a test of the Gazzi-Dickinson point-counting method: *Journal of Sedimentary Research*, v. 54, p. 103–116.

Table DR2. Detrital zircon age data  
2019361\_Table DR2.xlsx
